# Supplementary material for: Ionizing radiation improves glioma-specific targeting of superparamagnetic iron oxide nanoparticles conjugated with cmHsp70.1 monoclonal antibodies (SPION–cmHsp70.1)
Source: Royal Society of Chemistry journal article supplement (doi:10.1039/c5nr06521f), 2015-01-01
Supplement: c5nr06521f1.pdf [file c5nr06521f1.pdf]

## Supplementary material

**Supplementary Table 1. Mean (with standard deviation) of the T2 parameter for the following three cell lines: C6, K562, HeLa.** There were four observations for each cell line-condition pairing.

|                                | <b>C6</b>    | <b>K562</b>  | <b>HeLa</b>  |
|--------------------------------|--------------|--------------|--------------|
| <b>Control</b>                 | 67.75 (3.30) | 72.5 (5.20)  | 73.75 (6.75) |
| <b>SPION</b>                   | 55.5 (2.89)  | 59.75 (3.77) | 66 (4.08)    |
| <b>SPION-cmHsp70.1</b>         | 29.75 (1.71) | 41 (6.06)    | 42.25 (3.30) |
| <b>SPION-cmHsp70.1 + 10 Gy</b> | 17.5 (2.08)  | 22.5 (3.87)  | 25.25 (2.75) |

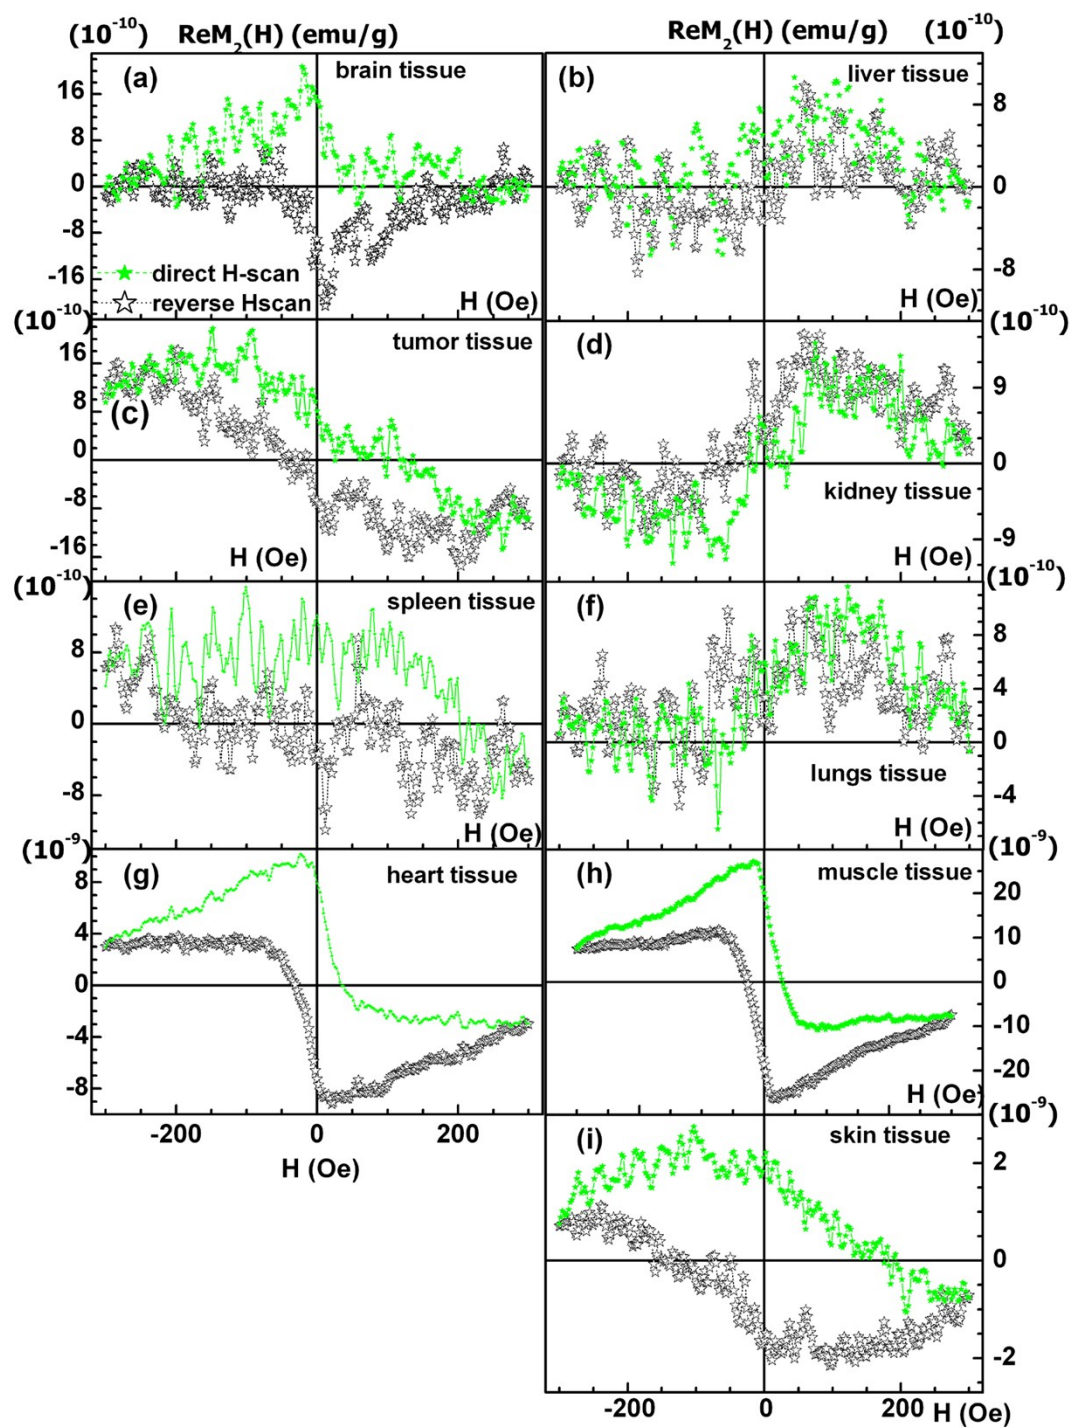

Supplementary Figure S1.  $\text{Re}M_2(H)$  part of the second harmonic of magnetization from control tissues.

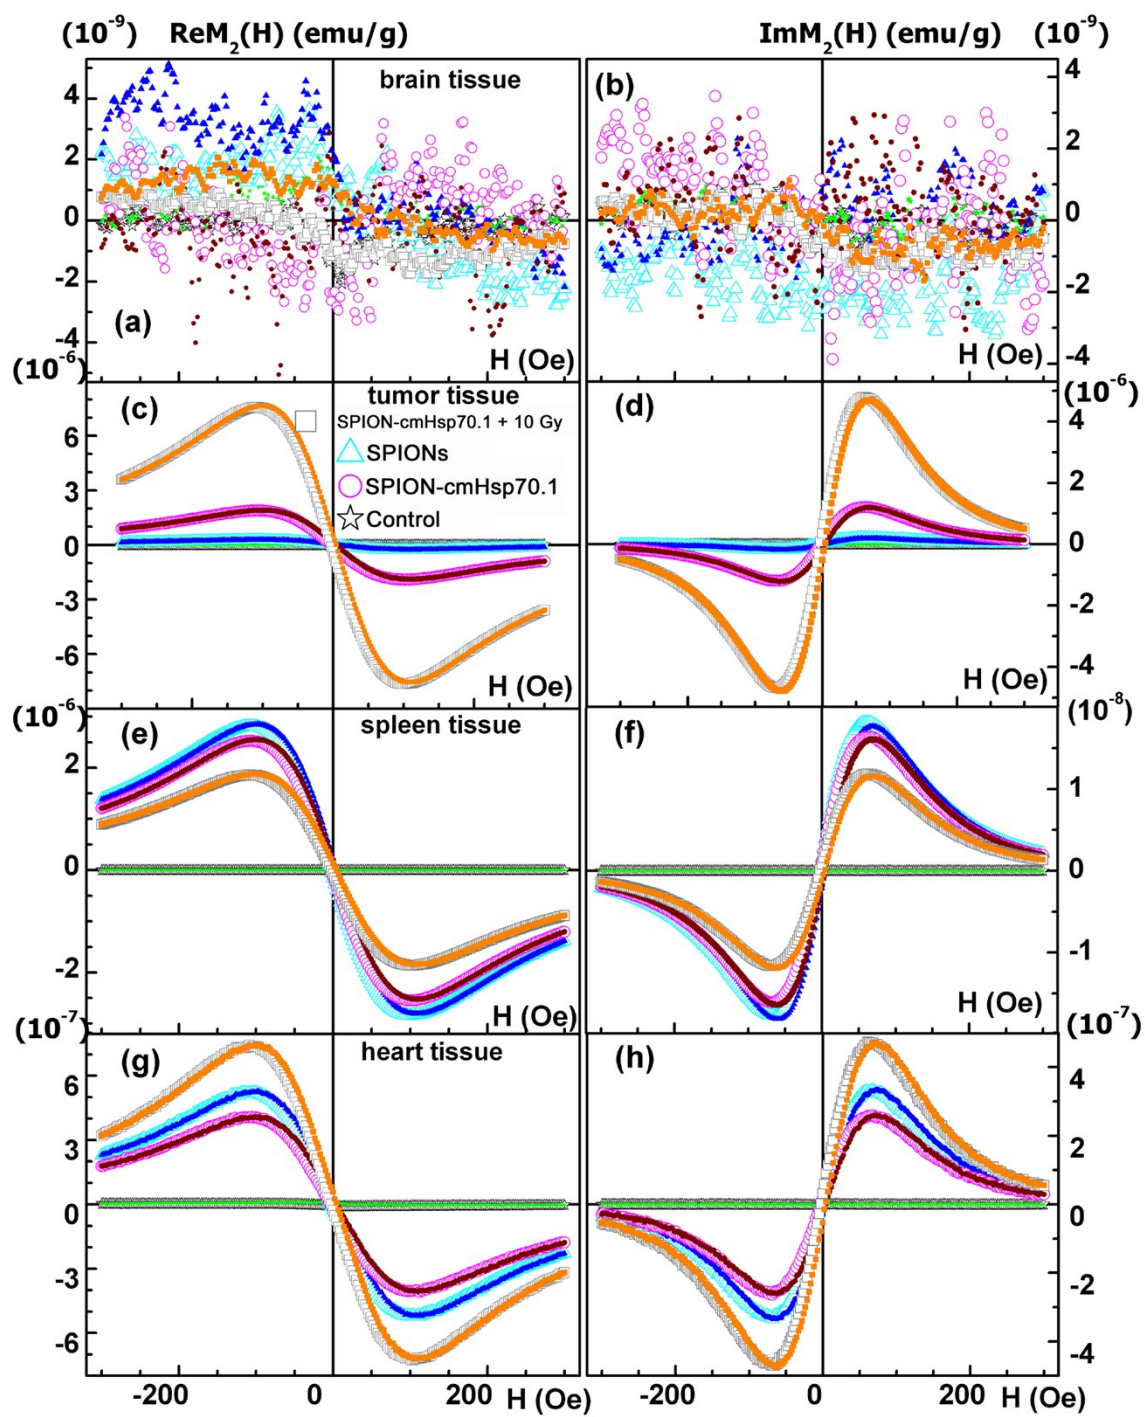

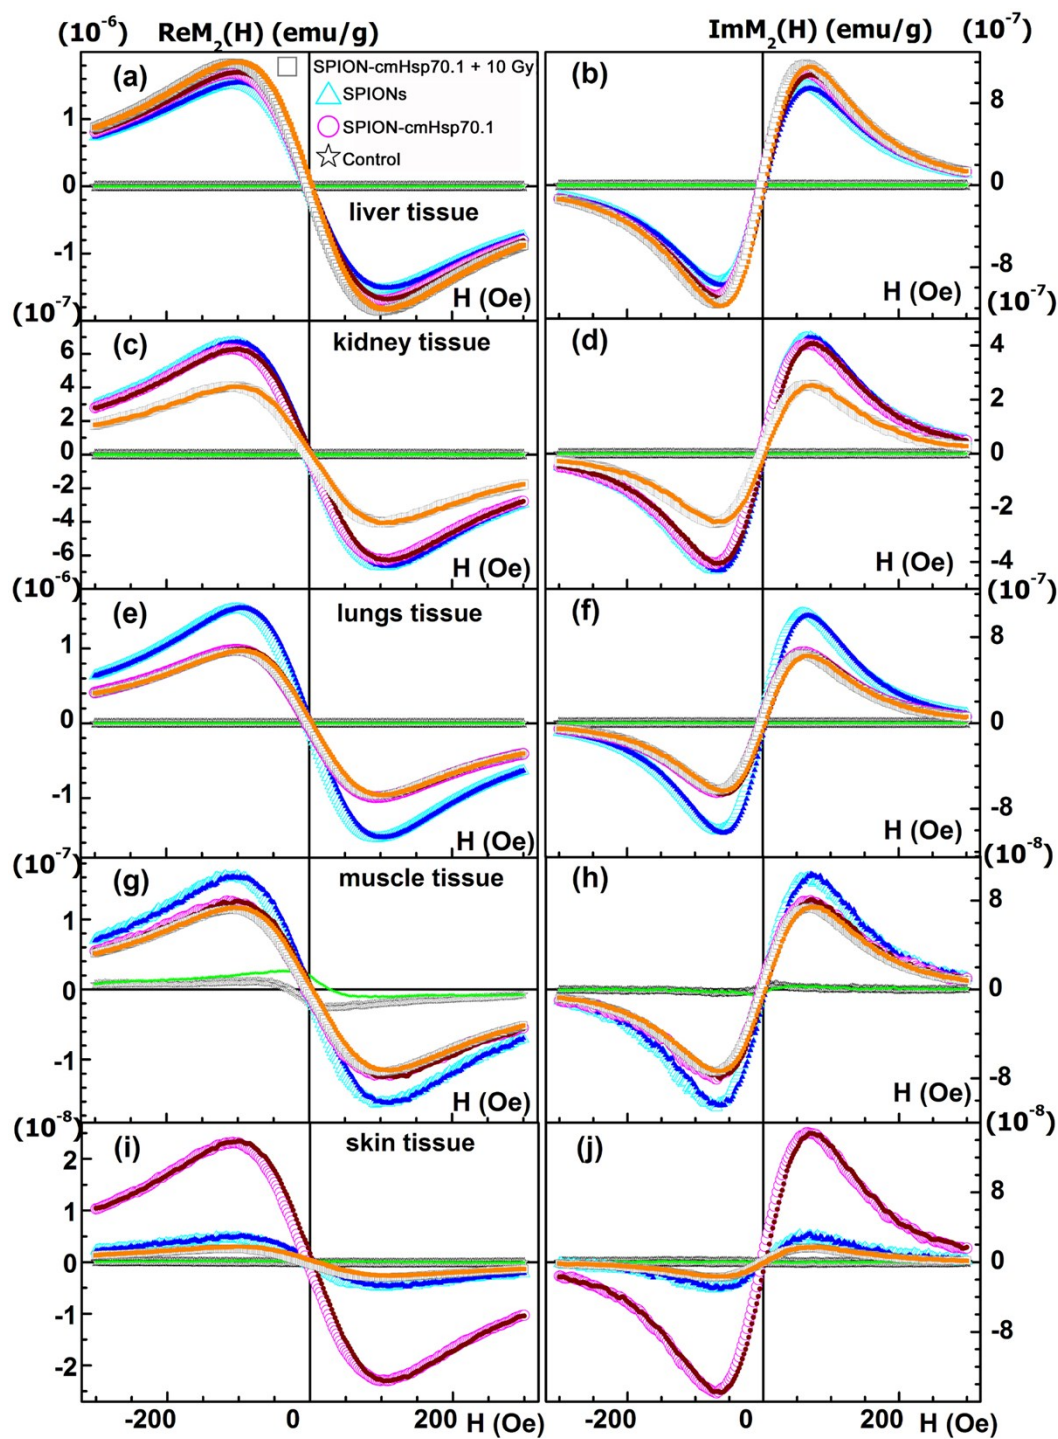

**Supplementary Figure S2. Biodistribution of superparamagnetic nanoparticles in non-irradiated animals treated with SPIONs, SPION-cmHsp70.1 particles and irradiated rats (10Gy) treated with SPION-cmHsp70.1 characterized by NLR- $M_2$  measurements. (A) Second harmonic measurement for brain, tumor, spleen and heart tissues. (B) Second harmonic measurement for liver, kidney, lungs, muscle and skin tissues.**
